# Supplementary material for: FEZ2 Has Acquired Additional Protein Interaction Partners Relative to FEZ1: Functional and Evolutionary Implications
Source: PubMed Central journal article supplement (PMC3050892; doi:10.1371/journal.pone.0017426), 2011-03-08
Supplement: pone.0017426.s001.pdf [file pone.0017426.s001.pdf]

```

*          20          *          40          *          60          *          80          *          100
Pt_FEZ1  : -----MEAPLVSLDEEFEDLRPCCSEDP----- : 24
Hs_FEZ1  : -----MEAPLVSLDEEFEDLRPCCSEDP----- : 24
Mf_FEZ1  : -----MEAPLVSLDEEFEDLRPCCSEDP----- : 24
Mmt_FEZ1 : -----MEAPLVSLDEEFEDLRPCCSEDP----- : 24
Bt_FEZ1  : -----MEAPLVSLDEEFEDLRPCCSEDP----- : 24
Cf_FEZ1  : -----MEAPLVSLDEEFEDLRPCCSEGE----- : 24
Rn_FEZ1  : -----MEAPLVSLDEEFEDIRPCCTEDP----- : 24
Mm_FEZ1  : -----MEAPLVSLDEEFEDIRPCTEPE----- : 24
Md_FEZ1  : -----MEAPLVSLDEEFEDLRPCYSEDRD----- : 24
Xt_FEZ1  : -----MEAPLVCLDEEFEDIR-SYSEDRQ----- : 23
Dr_FEZ1  : -----MEAPLVCLDEEFEDLRPCKMEELC----- : 25
Ss_FEZ1  : -----MEAPLVCLDEEFEDLRPCRVEDMDR----- : 25
Gg_FEZ1  : -----MEAPLVSLDEEFEEGEP----- : 16
Xt_FEZ2  : -----MAAPLAQFDEDWQDFYEFRAASSSDSGCLDKVNSNTPSAVAPLL----- : 44
Xl_FEZ2  : -----LDKVNNSPPPSERIQ----- : 16
Cf_FEZ2  : -----MAADGDWQDFYEFQ----- : 14
Bt_FEZ2  : -----MAADGDWQDFYEFQ----- : 14
Hs_FEZ2  : -----MAADGDWQDFYEFQ----- : 14
Pt_FEZ2  : -----MAADGDWQDFYEFQ----- : 14
Rn_FEZ2  : -----MAADGDWQDFYEFQ----- : 14
Mm_FEZ2  : -----AAGAMAADGDWQDFYEFQ----- : 18
Md_FEZ2  : -----MAADGDWQDFYEFQ----- : 14
Tg_FEZ2  : MAAQEKKYKIKKSHPKLLRVSAQYKASKGWARESQCSWLRQTTLGLPLLPDEPPLVGAELGVKRDITVPGSKGAATARLCCGCCPSPARPGPALRA----- : 96
Ec_FEZ2  : -----MDNSSELTQWHITMDWDC----- : 17
Tn_FEZ2  : -----MAAPLAQFDEDWQDFNEFK----- : 20
Dr_FEZ2  : -----MAAPVAQFDEDWEDFNEFK----- : 19
Bf_FEZ2b : -----MMESFKMAAPLAQIDDEWLDFTSPS----- : 25
Bf_FEZ2a : -----MAAPLAQIDDEWLDFTSPS----- : 19
Ci_FEZ1sim : -----MAAPLAQIEDWESAFSPTRLN----- : 24
Ce_UNC76 : -----MEAADLRVPDIPLASCDD----- : 19
Bm_UNC76 : -----MGTGMVENINCSVPEVPLAHLEDD----- : 24
Dps_UNC76 : -----MAELKFEAPLAKFEET-DEWGGCDFISNQNALNDTLNLN---LKEVSV : 44
Dp_UNC76 : -----MRDLGTRMAELKFEAPLAKFEET-DEWGGCDFISNQNALNDTLNLN---LKEVSV : 51
Ds_UNC76 : -----MAELKFEAPLAKFEET-DEWGGCDFISSQNAINDTLNLN---LKDSSA : 44
Dm_UNC76 : -----MRDLGTRMAELKFEAPLAKFEET-DEWGGCDFISSQNAINDTLNLN---LKDSSA : 51
Dy_UNC76 : -----MRDLGTRMAELKFEAPLAKFEET-DEWGGCDFISSQNALNDTLNLN---LKDSSS : 51
Da_UNC76 : -----MRDLGTRMAELKFEAPLAKFEET-DEWGGCDYISNQNALNDTLNLN---LKDAAA : 51
Dw_UNC76 : -----MRDLGTRMAELKFEAPLAKFEET-DEWGGCDFISNQNALNDTLNLN---LKD--- : 48
Dv_UNC76 : -----MAELKFEAPLAKFEET-DEWGGCDFISNQNALNDTLNLNLSNRRNQD : 47
Dmo_UNC76 : -----MRDLGTRMAELKFEAPLAKFEET-DEWGGCDFISNQNALNDTLNLNLSNRRNQKE : 54
Dg_UNC76 : -----MAELKFEAPLAKFEET-DEWGGCDFISNQNALN---ANRNLKD : 39
Tc_UNC76 : -----MRDLATKMAELKFEAPLAQFEES-DEWGSTEFQNAIKN----- : 38
Ag_UNC76 : -----MRDLANKMAELKFEAPLAQFEES-DEWGPVEYQSSNVANGKTAAVT----- : 45
Nv_UNC76 : -----MKDMATKIAELKFEAPLACFEES-E---STTIRN----- : 30
Am_UNC76 : -----MRDMAGKIAELKFEAPLARFEES-D---TASLKN----- : 30
Ph_UNC76 : -----MLDTARQMAELKFEAPLAQFEESSEDEWAIGGMTINTNDVVDN----- : 42
Ap_UNC76 : -----MLDMMNKMAELKFEAPLAQFEES-DEWTK--MMDDSDPLQSS----- : 39

```

```

*      120      *      140      *      160      *      180      *      200      *
Pt_FEZ1 : -----EKPCFCYFGSSPHHLEDPS-----LSELENFSS-- : 51
Hs_FEZ1 : -----EKPCFCYFGSSPHHLEDPS-----LSELENFSS-- : 51
Mf_FEZ1 : -----EKPRCFYFGSSPHHLEDPS-----LSELENFSS-- : 51
Mmt_FEZ1 : -----EKPRCFYFGSSPHHLEDPS-----LSELENFSS-- : 51
Bt_FEZ1 : -----EKPRCFYFGSSPHHLEDPS-----LSELENFSS-- : 51
Cf_FEZ1 : -----EKPPSFYFGSSPHHLEDPS-----LSELENFSS-- : 51
Rn_FEZ1 : -----EKPQSLYGTSPHHLEDPS-----LSELENFSS-- : 51
Mm_FEZ1 : -----EKPQCPLYGTSPHHLEDPS-----LSELENFSS-- : 51
Md_FEZ1 : -----EKPRCFYFGSSPHHLEDPS-----LSELENFSS-- : 51
Xt_FEZ1 : -----EKSRGMVMTSSKHIEDAS-----LSELENFSS-- : 50
Dr_FEZ1 : -----EQPPCR-PHKTIPLAPLIC-----R-----EDFSELENFS : 53
Ss_FEZ1 : -----AVPLSRFPYSTIPIIAPMAPLAPITR-----EDFSELENFS : 60
Gg_FEZ1 : -----GDNNGVPRRTMDPA-----LAELESFST : 39
Xt_FEZ2 : -----GQG-AGAVVALEDLAEILDN-----GFSMEIMG : 70
Xl_FEZ2 : -----GPGGAGAVVALEDLAEILDN-----GFSMEIMG : 43
Cf_FEZ2 : -----EPARSLQDQENCNASP-----EAGAGPGG : 38
Bt_FEZ2 : -----EPARSLQDQENCNASP-----EAGAGPGG : 38
Hs_FEZ2 : -----EPARSLLDQENCNASPEP-----GAEAGAGAGG : 42
Pt_FEZ2 : -----EPARSLLDQENCNASPEP-----GAGAGAGAGW : 42
Rn_FEZ2 : -----EPAGSVRDQENCNASP-----EAGAGAHA : 38
Mm_FEZ2 : -----EPAGSVQEQENCNASP-----EAGAGAHA : 42
Md_FEZ2 : -----EPARGRLDQENRNNSGA-----KMLIDE : 36
Tg_FEZ2 : -----IARPGFARLCGRCLSPARRAPLGARTAGSA-----QHRERAAPFRSQLW : 139
Ec_FEZ2 : -----PAEAEVLRRLNLGSKQKQKLELDS-----KHSKASPWS : 50
Tn_FEZ2 : -----SSASADQLDQLNSNVVD-----SASGLDIFSD : 47
Dr_FEZ2 : -----AADSHTSWTATPEN-----SPR-LQSFAS : 42
Bf_FEZ2b : -----DVVNSNDTTSCTDDNQD-----VDNVNDCFGF : 53
Bf_FEZ2a : -----DVVNSNDTTSCTDDNQD-----VDNVNDCFGF : 47
Ci_FEZ1sim : -----MCSTNVEQLEDVKNQNSMFGNS-----ENLDSIDNFIPI : 58
Ce_UNC76 : -----DIDSNKN-----LSNHSSDEKH-----HCNSNSDEE : 45
Bm_UNC76 : -----LDFIKV-----ASQQTSD-----CENNFDEN : 46
Dps_UNC76 : GRKP---DASKLRLLLEDVAVRDAHISKNGGV-----GSSAG-TISPNCNSSLGSSATDLGVSDAGLVPGDGA-----GLDKPSAAQG-DHVDN-- : 121
Dp_UNC76 : GRKP---DASKLRLLLEDVAVRDAHISKNGGV-----GSSAG-TISPNCNSSLGSSVTDLGVSDAGLVPGDGE-----VLDKPSAAQG-DHVDN-- : 128
Ds_UNC76 : GGKP---DSTKLRLLEDVAVRDAHISKNGGG-----VVGGAAG-SISPNCNTLHGGLSIEIGLSDVGLVPGEGAGVGLDGLKRSVAVG-DHVDN-- : 128
Dm_UNC76 : GGKP---DASKLRLLLEDVAVRDAHISKNGGG-----VVGGAAG-SISPNCNTLHGGLSIEIGLSDVGLVPGEGAGVGLDGLKRSVAVG-DHVDN-- : 135
Dy_UNC76 : GGKP---DAAKLRLLLEDVAVRDAHISKNGGGGG-----VMGGGAG-SISPNCNTLHGGLSIEIGLSDVGLVPGEGAGVGLDGLKRSVAVG-DHVDN-- : 137
Da_UNC76 : SGKSGDQTAGKLRLLLEDVAVRDAHISKNGGVDA--AAGASIGGSIISPNCNTMQG--ALDLGLSDVGLVPGEDA-----PQRCSGSD-DHVDN-- : 133
Dw_UNC76 : GGVVETAANNKLRLLLEDVAVRDAHISKNGGAG-----AGTGS-SISPNCNMGGG--TDLGISDGLVPGDGAG-----GAAAGSARGSDHVDN-- : 130
Dv_UNC76 : GNAKQQQQ-DKLRLLLEDVAVRDAHISKN-----GGGGGG-----GAGAG-NISPNCNTHNLG--ELGLADM--SGPAGG-----QDKRGADNVN-- : 121
Dmo_UNC76 : GSAKQQQQQDKLRLLLEDVAVRDAHISKNGAVATGAVGGAGAGGTGTGTGAG-NISPNCNTQNL--ELGLTD-----GLAGG-----QDKRGADNVN-- : 139
Dg_UNC76 : GNAKQQQQ-DKLRLLLEDVAVRDAHISKNGGAAAAVSGAGAAGSG-----SGTSG-NISPNCNTNLSD--VLGEATPGVGLGIGL-----GDRRAADNVN-- : 126
Tc_UNC76 : -----ENELNINLNKIKIKIIN-----DVLNDFNEDILN-----NSNTETLPPKN-----VILKNGETASVADN-- : 92
Ag_UNC76 : -----ISDTLNLNKLKESLRLSDGNQQQQQ-----NQKQDDDLNMLNLDNLLGDDTVRGGGDSNTTTTTTTA-----NNNNNIKVGP IKDNV-- : 122
Nv_UNC76 : -----MNIFSDHILDVNIERNFVE-----NRKNTTAN-----THET-SDIIQE----- : 68
Am_UNC76 : -----MNLTEQLLDTSLNNTTYGE-----NCNANEPA-----TRENGETDILQE----- : 69
Ph_UNC76 : -----FKNILLNSPLKKNINENFTN-----NIKNSKSGIFISNKGEINNMDFAYEKINGYSKE-----DMLKNLNQGNVSSEN-- : 110
Ap_UNC76 : -----AKHNLNHHHHHQGNSQLTSG-----GSVRDVDEEQLDNMLSNSS--RALEPANKSCTQCGAN-----NNVGVVEVTTSTTDN-- : 110

```

|            | 220                                                            | 240                         | 260                              | 280 | 300 |  |
|------------|----------------------------------------------------------------|-----------------------------|----------------------------------|-----|-----|--|
| Pt_FE21    | ---EII SFKSMEDLVN FDEKINVCFRNNAKTEN---                         | LAPVKNQIQIQEEETLC           | ---EEVWDALTDNYIP-SISEQRDPNI---   | 126 |     |  |
| Hs_FE21    | ---EII SFKSMEDLVN FDEKINVCFRNNAKTEN---                         | LAPVKNQIQIQEEETLC           | ---EEVWDALTDNYIP-SISEQRDPNI---   | 126 |     |  |
| Mf_FE21    | ---EII SFKSMEDLVN FDEKINVCFRNNAKTEN---                         | LAPVKNQIQIQEEETLC           | ---EEVWDALTDNYIP-SISEQRDPNI---   | 126 |     |  |
| Nmt_FE21   | ---EII SFKSMEDLVN FDEKINVCFRNNAKTEN---                         | LAPVKNQIQIQEEETLC           | ---EEVWDALTDNYIP-SISEQRDPNI---   | 126 |     |  |
| Bf_FE21    | ---EII SFKSMEDLVN FDEKINVCFRNNAKTEN---                         | LAPVKNQIQIQEEETLC           | ---EEVWDALTDNYIP-SISEQRDPNI---   | 126 |     |  |
| Ct_FE21    | ---EII SFKSMEDLVN FDEKINVCFRNNAKTET---                         | LAPVKNQIQIQEEETLC           | ---EEVWDALTDNYIP-SISEQRDPNI---   | 126 |     |  |
| Rn_FE21    | ---EII SFKSMEDLVN FDEKINVCFRNNAKTEN---                         | LAPVKNQIQIQEEETLC           | ---EEVWDALTDNYIP-SISEQRDPNI---   | 126 |     |  |
| Nm_FE21    | ---EII SFKSMEDLVN FDEKINVCFRNNAKTES---                         | LAPVKNQIQIQEEETLC           | ---EEVWDALTDNYIP-SISEQRDPNI---   | 126 |     |  |
| Md_FE21    | ---EII SFKSMEDLVN FDEKINVCFRNNAKTEN---                         | LAPVKNQIQIQEEETLC           | ---EEVWDALTDNYIP-SISEQRDPNI---   | 126 |     |  |
| Xt_FE21    | ---EII SFKSMEDLVN FDEKINVCFRNNAKTEN---                         | LAPVKNQIQIQEEETLC           | ---EEVWDALTDNYIP-SISEQRDPNI---   | 126 |     |  |
| Dr_FE21    | ---EMMSFKSMEDLVN FDEKINVCFRNNAKTETEG---                        | LAPVKNQIQIQEEETLC           | ---EEVWDALTDNYIP-SISEQRDPNI---   | 126 |     |  |
| Ss_FE21    | ---EMMSFKSMEDLVN FDEKINVCFRNNAKTETEG---                        | LAPVKNQIQIQEEETLC           | ---EEVWDALTDNYIP-SISEQRDPNI---   | 126 |     |  |
| Gg_FE21    | ---EMMSFKSMEDLVN FDEKINVCFRNNAKTETEG---                        | LAPVKNQIQIQEEETLC           | ---EEVWDALTDNYIP-SISEQRDPNI---   | 126 |     |  |
| Xt_FE22    | ---GFKSMEDLVN FDEKINVCFRNNAKTET---                             | LAPVKNQIQIQEEETLC           | ---EEVWDALTDNYIP-SISEQRDPNI---   | 126 |     |  |
| Xl_FE22    | ---GFKSMEDLVN FDEKINVCFRNNAKTET---                             | LAPVKNQIQIQEEETLC           | ---EEVWDALTDNYIP-SISEQRDPNI---   | 126 |     |  |
| Ct_FE22    | ---GGDGFPAACSLBEKLSLCFRPSPG---                                 | GAEPPRAARPIPECSLTC          | ---GDEIWNALTDNYG-VMPVDRKSSHTR--- | 108 |     |  |
| Bf_FE22    | ---GGDGFPAACSLBEKLSLCFRPSPG---                                 | GAEPPRAARPIPECSLTC          | ---GDEIWNALTDNYG-VMPVDRKSSHTR--- | 108 |     |  |
| Hs_FE22    | ---GADGFPAACSLBEKLSLCFRPSPD---                                 | GAEPPRTAARPIPECSLTC         | ---GDEIWNALTDNYG-VMPVDRKSSHTR--- | 112 |     |  |
| Pt_FE22    | ---GRRSPFGVCSMSQSLTCIYSSSPL---                                 | LALPPEPSPARSAATATVLC        | ---TSEIWNALTDNYG-VMPVDRKSSHTR--- | 114 |     |  |
| Rn_FE22    | ---GGDGFPAACSLBEKLSLCFRPSPD---                                 | ADEPPRAARPIPECSLTC          | ---GDEIWNALTDNYG-VMPVDRKSSHTR--- | 107 |     |  |
| Nm_FE22    | ---GGDGFPAACSLBEKLSLCFRPSPD---                                 | ADEPPRAARPIPECSLTC          | ---GDEIWNALTDNYG-VMPVDRKSSHTR--- | 111 |     |  |
| Md_FE22    | ---GGVGFSAACGLBEKLSLCFRPSPD---                                 | DTESPRAAARPIPECSLTC         | ---GDEIWNALTDNYG-VMPVDRKSSHTR--- | 106 |     |  |
| Td_FE22    | ---RRQLRPRSETRAIGRSRDSSPPREFRACLRQGLRGRGSRGEAVPTASPGADPPGACGLR | RRLSFPFPGQLPGAAGPRTWALTDNYG | ---VMPVDRKSSHTR---               | 243 |     |  |
| Ec_FE22    | ---KGDRAVNIREDSGTERDPNAARLTG---                                | PRGPPRGESSALRCLG---         | GARVWALTDNYG-VMPVDRKSSHTR---     | 118 |     |  |
| Tn_FE22    | ---LDNSFSGECSKSMEDLVN FDEKLTVCFRNNTTTD                         | LAPVKNQIQIQEEETLC           | ---EEVWDALTDNYIP-SISEQRDPNI---   | 126 |     |  |
| Dr_FE22    | ---LDETHS---ASFP---YSCSACTNDSYTAVSESITR---                     | ---                         | ---DDIWNALTDNYG-VMPVDRKSSHTR---  | 99  |     |  |
| Bf_FE22b   | ---VVSFKSMEDLVN FDEKINVCFRNNAKTEN---                           | TDSIAPVQVRSQEEIMN           | ---ECQMWWTITGNFGN-ILPIDRKSXYR--- | 124 |     |  |
| Bf_FE22a   | ---VVSFKSMEDLVN FDEKINVCFRNNAKTEN---                           | TDSIAPVQVRSQEEIMN           | ---ECQMWWTITGNFGN-ILPIDRKSXYR--- | 118 |     |  |
| Ci_FE21sim | ---PELLSYSMEDLVN FDEKINVCFRNNAKTEN---                          | VQENPKPFNAETITD             | ---DYIWKRLSDNYGL-VQPLNGETSLVR--- | 132 |     |  |
| Ca UNC76   | ---RLHDFSGSLEDLVN FDEKINVCFRNNAKTEN---                         | TADTAPVQVRSQEEIMN           | ---ECQMWWTITGNFGN-ILPIDRKSXYR--- | 119 |     |  |
| Em UNC76   | ---FTDENLGSLEDLVN FDEKINVCFRNNAKTEN---                         | VEELAPVQVRSQEEIMN           | ---ECQMWWTITGNFGN-ILPIDRKSXYR--- | 120 |     |  |
| Dps UNC76  | ---FTTFFGGSLEDLVN FDEKINVCFRNNAKTEN---                         | VEELAPVQVRSQEEIMN           | ---ECQMWWTITGNFGN-ILPIDRKSXYR--- | 194 |     |  |
| Dp UNC76   | ---FTTFFGGSLEDLVN FDEKINVCFRNNAKTEN---                         | VEELAPVQVRSQEEIMN           | ---ECQMWWTITGNFGN-ILPIDRKSXYR--- | 201 |     |  |
| Ds UNC76   | ---FTTFFGGSLEDLVN FDEKINVCFRNNAKTEN---                         | VEELAPVQVRSQEEIMN           | ---ECQMWWTITGNFGN-ILPIDRKSXYR--- | 201 |     |  |
| Lm UNC76   | ---FTTFFGGSLEDLVN FDEKINVCFRNNAKTEN---                         | VEELAPVQVRSQEEIMN           | ---ECQMWWTITGNFGN-ILPIDRKSXYR--- | 208 |     |  |
| Dy UNC76   | ---FTTFFGGSLEDLVN FDEKINVCFRNNAKTEN---                         | VEELAPVQVRSQEEIMN           | ---ECQMWWTITGNFGN-ILPIDRKSXYR--- | 210 |     |  |
| Da UNC76   | ---FTTFFGGSLEDLVN FDEKINVCFRNNAKTEN---                         | VEELAPVQVRSQEEIMN           | ---ECQMWWTITGNFGN-ILPIDRKSXYR--- | 206 |     |  |
| Dw UNC76   | ---FTTFFGGSLEDLVN FDEKINVCFRNNAKTEN---                         | VEELAPVQVRSQEEIMN           | ---ECQMWWTITGNFGN-ILPIDRKSXYR--- | 203 |     |  |
| Dv UNC76   | ---FTTFFGGSLEDLVN FDEKINVCFRNNAKTEN---                         | VEELAPVQVRSQEEIMN           | ---ECQMWWTITGNFGN-ILPIDRKSXYR--- | 194 |     |  |
| Lmo UNC76  | ---FTTFFGGSLEDLVN FDEKINVCFRNNAKTEN---                         | VEELAPVQVRSQEEIMN           | ---ECQMWWTITGNFGN-ILPIDRKSXYR--- | 212 |     |  |
| Dg UNC76   | ---FTTFFGGSLEDLVN FDEKINVCFRNNAKTEN---                         | VEELAPVQVRSQEEIMN           | ---ECQMWWTITGNFGN-ILPIDRKSXYR--- | 199 |     |  |
| Tc UNC76   | ---FTTFFGGSLEDLVN FDEKINVCFRNNAKTEN---                         | VEELAPVQVRSQEEIMN           | ---ECQMWWTITGNFGN-ILPIDRKSXYR--- | 165 |     |  |
| Ag UNC76   | ---DFAEAFSGSLEDLVN FDEKINVCFRNNAKTEN---                        | VEELAPVQVRSQEEIMN           | ---ECQMWWTITGNFGN-ILPIDRKSXYR--- | 196 |     |  |
| Nv UNC76   | ---GSFSPFSGSLEDLVN FDEKINVCFRNNAKTEN---                        | VESLAPVQVRSQEEIMN           | ---ECQMWWTITGNFGN-ILPIDRKSXYR--- | 142 |     |  |
| Am UNC76   | ---GTFSPFSGSLEDLVN FDEKINVCFRNNAKTEN---                        | VESLAPVQVRSQEEIMN           | ---ECQMWWTITGNFGN-ILPIDRKSXYR--- | 143 |     |  |
| Ph UNC76   | ---FTTFFGGSLEDLVN FDEKINVCFRNNAKTEN---                         | VEELAPVQVRSQEEIMN           | ---ECQMWWTITGNFGN-ILPIDRKSXYR--- | 183 |     |  |
| Ap UNC76   | ---FGTFFGGSLEDLVN FDEKINVCFRNNAKTEN---                         | VEELAPVQVRSQEEIMN           | ---ECQMWWTITGNFGN-ILPIDRKSXYR--- | 183 |     |  |

|            | 320                                          | *                         | 340                 | * | 360 | *   | 380             | *                                                                         | 400     | *     | 420   |
|------------|----------------------------------------------|---------------------------|---------------------|---|-----|-----|-----------------|---------------------------------------------------------------------------|---------|-------|-------|
| Pt_FE21    | : --EALNGNCSDTEIHE                           |                           |                     |   |     |     | KEEE            | EFNEKSEND                                                                 | SGINEEP |       | : 160 |
| Hs_FE21    | : --EALNGNCSDTEIHE                           |                           |                     |   |     |     | KEEE            | EFNEKSEND                                                                 | SGINEEP |       | : 160 |
| Mf_FE21    | : --EALNGNCSDPEIHE                           |                           |                     |   |     |     | KEEE            | EFNEKSEND                                                                 | SGINEEP |       | : 160 |
| Nmt_FE21   | : --EALNGNCSDTEIHE                           |                           |                     |   |     |     | KEEE            | EFNEKSEND                                                                 | SGINEEP |       | : 160 |
| Bt_FE21    | : --EALNGNNSDTEIHE                           |                           |                     |   |     |     | KEEE            | EFNEKSEHD                                                                 | SGITEEP |       | : 160 |
| Cf_FE21    | : --EALNGNSSDTEIHE                           |                           |                     |   |     |     | KEEE            | EFNEKSEHD                                                                 | SGINEEP |       | : 160 |
| Rn_FE21    | : --EALNGNSSDTEIHE                           |                           |                     |   |     |     | KEEDEFIERSEND   | SGINEEP                                                                   |         | : 161 |       |
| Nm_FE21    | : --EALNGNSDIEIHE                            |                           |                     |   |     |     | KEEE            | EFNEKSEND                                                                 | SGINEEP |       | : 160 |
| Md_FE21    | : --EALNGNNSDTEIHE                           |                           |                     |   |     |     | KEEE            | EFNEKSEND                                                                 | SGINEEP |       | : 160 |
| Xt_FE21    | : --ESLNGNNSDSEFHE                           |                           |                     |   |     |     | KDEE            | EFNEKSEND                                                                 | SGIIEEP |       | : 159 |
| Dr_FE21    | : --ETLNGNNSDQETHE                           |                           |                     |   |     |     | KDED            | ENNEKNENA                                                                 | NCINEEP |       | : 162 |
| Ss_FE21    | : --EGFNGNNSDQETHE                           |                           |                     |   |     |     | KEEE            | ENNEKNENA                                                                 | NCISEEP |       | : 169 |
| Gg_FE21    | : --EAPDG--TDPOLCE                           |                           |                     |   |     |     | KEDE            | EFNERSEHD                                                                 | SGINEEP |       | : 147 |
| Xt_FE22    | : A <del>HLPTLN</del> LDKAVNEN               |                           |                     |   |     | LN  | LDLSDEE         | E <del>IREQ</del> LD <del>MSI</del> IVSCINEEP                             |         | : 185 |       |
| XI_FE22    | : A <del>HLPTLN</del> LDKAVNDN               |                           |                     |   |     | IN  | LDLSDEE         | E <del>IREQ</del> LD <del>MSI</del> IVSCINEEP                             |         | : 158 |       |
| Cf_FE22    | : T <del>HLLT</del> LN <del>SEK</del> GVSDS  |                           |                     |   |     | LL  | FLTSDEE         | E <del>IREQ</del> LD <del>MSI</del> IVSCVNEEP                             |         | : 154 |       |
| Bt_FE22    | : T <del>HLLT</del> LN <del>SEK</del> GVSDG  |                           |                     |   |     | LL  | FLTSDEE         | E <del>IREQ</del> LD <del>MSI</del> IVSCVNDPE                             |         | : 154 |       |
| Hs_FE22    | : T <del>HLLT</del> LN <del>SEK</del> GVSDS  |                           |                     |   |     | LL  | FLTSDEE         | E <del>IREQ</del> LD <del>MSI</del> IVSCVNDPE                             |         | : 158 |       |
| Rt_FE22    | : T <del>HLLT</del> LN <del>SEK</del> GVSDS  |                           |                     |   |     | LL  | FLTSDEE         | E <del>IREQ</del> LD <del>MSI</del> IVSCVNDPE                             |         | : 160 |       |
| Rn_FE22    | : T <del>HLLT</del> LN <del>SEK</del> GVSDG  |                           |                     |   |     | LP  | FLTSDEE         | E <del>IREQ</del> LD <del>MSI</del> IVSCVNEEP                             |         | : 153 |       |
| Nm_FE22    | : T <del>HLLT</del> LN <del>SEK</del> GMNDG  |                           |                     |   |     | LL  | FLASDEE         | E <del>IREQ</del> LD <del>MSI</del> IVSCVNEEP                             |         | : 157 |       |
| Md_FE22    | : T <del>HLLT</del> LN <del>SEK</del> GINDN  |                           |                     |   |     | LI  | FLASDEE         | E <del>IREQ</del> LD <del>MSI</del> IVSCVNDPE                             |         | : 152 |       |
| Tg_FE22    | : A <del>HLPTLN</del> SEKGVNDN               |                           |                     |   |     | LN  | LDLSDEE         | E <del>IREQ</del> LD <del>MSI</del> IVSCINEEP                             |         | : 289 |       |
| Ec_FE22    | : T <del>HLLT</del> LN <del>SEK</del> GVSDS  |                           |                     |   |     | LL  | FLTSDEE         | E <del>IREQ</del> LD <del>MSI</del> IVSCVDEE                              |         | : 164 |       |
| Tn_FE22    | : S <del>HLP</del> ILN <del>SEK</del> QEKVSD |                           |                     |   |     | QS  | LDLSDEE         | E <del>IREQ</del> LD <del>MSI</del> IVSSVDEE                              |         | : 172 |       |
| Dr_FE22    | : S <del>HLP</del> ILN <del>RPQ</del> ERLEV  |                           |                     |   |     | NN  | LDLSDEE         | E <del>IRDQ</del> LD <del>MSI</del> IVSCVNEEP                             |         | : 145 |       |
| Bf_FE22b   | : Q <del>YNK</del> ALN <del>NEQ</del> R-REE  |                           |                     |   |     | PMN | LDLSDEE         | E <del>IRSF</del> LD <del>MSI</del> IVSSVQEP                              |         | : 170 |       |
| Bf_FE22a   | : Q <del>YNK</del> ALN <del>NEQ</del> RVREE  |                           |                     |   |     | PMN | LDLSDEE         | E <del>IRSF</del> LD <del>MSI</del> IVSSVQEP                              |         | : 165 |       |
| Ci_FE21sim | : K <del>HIP</del> AN <del>DP</del> EKATS    |                           |                     |   |     |     |                 | EKEVKAETDPE <del>JEKQ</del> LD <del>MSI</del> IVSSVQEP                    |         | : 195 |       |
| Ca UNC76   | : K <del>KMAA</del> AN <del>SD</del> SLRDD   |                           |                     |   |     |     |                 | A <del>STR</del> RSMTNSD <del>ED</del> LD <del>MSI</del> IVSSVQEP         |         | : 174 |       |
| Em UNC76   | : R <del>QL</del> EAL <del>DD</del> QGPKE    |                           |                     |   |     |     |                 | NSD-LGILSEDEE-E <del>IR</del> SAL <del>DM</del> HAL <del>DL</del> INGLN-G |         | : 169 |       |
| DPs UNC76  | : Q <del>HMP</del> TLN <del>GC</del> NHTKC   | QQQQQHQRNQHQLQKHQHSYPHTP  |                     |   |     |     | GGDEFN          | DLASEDEAN <del>LD</del> MSIIVSSVQEP                                       |         | : 271 |       |
| Ds UNC76   | : Q <del>HMP</del> TLN <del>GC</del> NHTKC   | QQQQQHQRNQHQLQKHQHSYPHTP  |                     |   |     |     | GGDEFN          | DLASEDEAN <del>LD</del> MSIIVSSVQEP                                       |         | : 278 |       |
| Dp UNC76   | : Q <del>HMP</del> TLN <del>GC</del> NHTKC   | QQQNRNQQQQLHTQSHQ-AYPHTN  | GAGSGSGLDAQTPGDEFN  |   |     |     |                 | DLTSEDEAN <del>LD</del> MSIIVSSVQEP                                       |         | : 289 |       |
| Lm UNC76   | : Q <del>HMP</del> TLN <del>GC</del> NHTKC   | QQQNRNQQQQLHNQSHQ-AYPHTN  | GLSGSGSGLDAQTPGDEFN |   |     |     |                 | DLTSEDEAN <del>LD</del> MSIIVSSVQEP                                       |         | : 298 |       |
| Dy UNC76   | : Q <del>HMP</del> TLN <del>GC</del> NHTKC   | QQQARNQQQQLHNQSHQ-AYPHTN  | GSSAGLDAQTPGDEFN    |   |     |     |                 | DLTSEDEAN <del>LD</del> MSIIVSSVQEP                                       |         | : 296 |       |
| Da UNC76   | : Q <del>HMP</del> TLN <del>GC</del> NPTRC   | QQNSRNQQQQQLHHTQSHSNGF    | FGSGSGSSEAQTTPGDEFN |   |     |     |                 | DLTSEDEAN <del>LD</del> MSIIVSSVQEP                                       |         | : 297 |       |
| Dw UNC76   | : Q <del>HMP</del> TLN <del>GC</del> SLTRC   | QQQQRNQQQQQQQQQQHQYQQQQHQ |                     |   |     |     | QQQHNACTPSEDEFN | DLTSEDEAN <del>LD</del> MSIIVSSVQEP                                       |         | : 289 |       |
| Dv UNC76   | : Q <del>HMP</del> TLN <del>GC</del> SRTKC   | QQQQRNQLQQQQQQQQQQQQSQ    |                     |   |     |     | TLDAQTPVDEFN    | DLTSEDEAN <del>LD</del> MSIIVSSVQEP                                       |         | : 277 |       |
| Lmo UNC76  | : Q <del>HMP</del> TLN <del>GC</del> SRTKC   | QQQQQRNQLQQQQQQQQQQQQSQ   |                     |   |     |     | TPVDEFN         | DLTSEDEAN <del>LD</del> MSIIVSSVQEP                                       |         | : 287 |       |
| Dg UNC76   | : Q <del>HMP</del> TLN <del>GC</del> NRTRC   | RSQQQQQQQQQQQQQQSPHRQQQQQ |                     |   |     |     | QQNAQTPVDEFN    | DLTSEDEAN <del>LD</del> MSIIVSSVQEP                                       |         | : 283 |       |
| Tc UNC76   | : K <del>HMP</del> ALN <del>NEK</del> EATT   |                           |                     |   |     |     | PDDDL           | DLTSEDEAN <del>LD</del> MSIIVSSVQEP                                       |         | : 215 |       |
| Ag UNC76   | : Q <del>HVP</del> ALN <del>GM</del> RKPGT   |                           |                     |   |     |     | PDDDEL          | DLTSEDEAN <del>LD</del> MSIIVSSVQEP                                       |         | : 248 |       |
| Nv UNC76   | : K <del>HVP</del> ALN <del>NE</del> SAKSF   |                           |                     |   |     |     | DGNGL           | DLTSEDEAN <del>LD</del> MSIIVSSVQEP                                       |         | : 196 |       |
| Am UNC76   | : K <del>HMP</del> ALN <del>NEA</del> PVSC   |                           |                     |   |     |     | EPELE           | DLTSEDEAN <del>LD</del> MSIIVSSVQEP                                       |         | : 197 |       |
| Ph UNC76   | : K <del>HVP</del> ALN <del>TE</del> NNGGN   |                           |                     |   |     |     | SNDDII          | NLSRDEAN <del>LD</del> MSIIVSSVQEP                                        |         | : 234 |       |
| Ap UNC76   | : K <del>QL</del> EVN <del>LN</del> NNNIQDE  |                           |                     |   |     |     | SSD             | DLTSEDEAN <del>LD</del> MSIIVSSVQEP                                       |         | : 231 |       |

|            | * 440                  | * 460            | * 480         | * 500             | * 520            |               |             |          |         |        |        |       |     |       |       |
|------------|------------------------|------------------|---------------|-------------------|------------------|---------------|-------------|----------|---------|--------|--------|-------|-----|-------|-------|
| Pt_FE21    | : LLTADQVIEIEBMMNSPDP  | -----EEEEVLEB    | EDGGETSSQADS  | -----VLLQCMCAITQT | FNNNW-SVEE       | LRHMSGSEITELL | LDQVGAIRD   | -FS      | : 248   |        |        |       |     |       |       |
| Hs_FE21    | : LLTADQVIEIEBMMNSPDP  | -----EEEEVLEB    | EDGGETSSQADS  | -----VLLQCMCAITQT | FNNNW-SVEG       | LRHMSGSEITELL | LDQVGAIRD   | -FS      | : 247   |        |        |       |     |       |       |
| Mf_FE21    | : LLTADQVIEIEBMMNSPDP  | -----EEEEVLEB    | EDGGETSSQADS  | -----VLLQCMCAITQT | FNNNW-SVEG       | LRHMSGSEITELL | LDQVGAIRD   | -FS      | : 247   |        |        |       |     |       |       |
| Nmt_FE21   | : LLTADQVIEIEBMMNSPDP  | -----EEEEVLEB    | EDGGETSSQADS  | -----VLLQCMCAITQT | FNNNW-SVEG       | LRHMSGSEITELL | LDQVGAIRD   | -FS      | : 247   |        |        |       |     |       |       |
| Lb_FE21    | : LLTADQVIEIEBMMNSPDP  | -----EEEEVLEB    | EDGGETSSQADS  | -----VLLQCMCAITQT | FNNNW-SVEG       | LRHMSGSEITELL | LDQVGAIRD   | -FS      | : 247   |        |        |       |     |       |       |
| Cf_FE21    | : LLTADQVIEIEBMMNSPDP  | -----EEEEVLEB    | EDGEETSSQADS  | -----VLLQCMCAITQT | FNNNW-SVEG       | LRHMSGSEITELL | LDQVGAIRD   | -FS      | : 247   |        |        |       |     |       |       |
| Rn_FE21    | : LLTADQVIEIEBMMNSPDP  | -----EEEVEVLEB   | EDGEETSSQADS  | -----VLLQCMCAITQT | FNNNW-SVEG       | LRHMSGSEITELL | LDQVGAIRD   | -FS      | : 248   |        |        |       |     |       |       |
| Nm_FE21    | : LLTADQVIEIEBMMNSPDP  | -----EEEEVLEB    | EDGEETSSQADS  | -----VLLQCMCAITQT | FNNNW-SVEG       | LRHMSGSEITELL | LDQVGAIRD   | -FS      | : 247   |        |        |       |     |       |       |
| Nd_FE21    | : LLTADQVIEIEBMMNSPDP  | -----EDEEEVLEB   | DIGGETSSQADS  | -----VLLQCMCAITQT | FNNNW-SVEG       | LRHMSGSEITELL | LDQVGAIRD   | -YS      | : 247   |        |        |       |     |       |       |
| Xt_FE21    | : LLTADQVIEIEBMMNSPDP  | -----EEDLDDEHD   | HTEINSSHSDS   | -----VLLQCMCAITQT | FNNNW-SVEG       | LRHMSGSEITELL | LDQVGAIRD   | -YS      | : 248   |        |        |       |     |       |       |
| Kr_FE21    | : LLTADQVIEIEBMMNSPDP  | -----GETEE       | EEDLIGVSSKSSP | -----SLLE         | LRMLSCASNNC-SVEG | LRHMSGSEITELL | LDQVGAIRD   | -YS      | : 247   |        |        |       |     |       |       |
| Ss_FE21    | : LLTADQVIEIEBMMNSPDP  | -----GETEE       | EDEESGHSSKSSP | -----SLLE         | LRQLSCASNMPSEV   | LRHMSGSEITELL | LDQVGAIRD   | -YS      | : 256   |        |        |       |     |       |       |
| Gg_FE21    | : LLTADQVIEIEBMMNSPDP  | -----EADPEGDEDEE | EEDAANAEGD    | SGSRGMEPIVLE      | HTFSPFNNNC-SHEG  | LRHMSGSEITELL | LDQVGAIRD   | -LS      | : 248   |        |        |       |     |       |       |
| Xt_FE22    | : LFTAEQVIEIEBMMNSPDP  | -----EDDTHC      | SIRLSMLS      | -----CEICTL       | LKKA-STNR-SHED   | LRHMSGSEITELL | LDQVGAIRD   | -YS      | : 264   |        |        |       |     |       |       |
| Xl_FE22    | : LFTAEQVIEIEBMMNSPDP  | -----EDDTPC      | SIRLSMLS      | -----CEICTL       | LKKS-STNS-SHEAK  | VRKRSVAFIND   | LEBEI       | TAI      | KD      | -YS    | : 237  |       |     |       |       |
| Cf_FE22    | : LFTAEQVIEIEBMMNSPDP  | -----EDDE        | TPTSIRLSMLS   | -----CEICTL       | LKRS-STG-SVEE    | VRKRSVAFIND   | LEBEI       | SAI      | KE      | -YS    | : 232  |       |     |       |       |
| Bf_FE22    | : LFTAEQVIEIEBMMNSPDP  | -----EDDE        | TPTSIRLSMLS   | -----CEICTL       | LKRS-STG-SVEE    | VRKRSVAFIND   | LEBEI       | SAI      | KE      | -YS    | : 232  |       |     |       |       |
| Hs_FE22    | : LFTAEQVIEIEBMMNSPDP  | -----EDDE        | TPTSIRLSMLS   | -----CEICTL       | LKRS-STG-SVEE    | VRKRSVAFIND   | LEBEI       | SAI      | KE      | -YS    | : 236  |       |     |       |       |
| Rt_FE22    | : LFTAEQVIEIEBMMNSPDP  | -----EDDE        | TPTSIRLSMLS   | -----CEICTL       | LKRS-STG-SVEE    | VRKRSVAFIND   | LEBEI       | SAI      | KE      | -YS    | : 238  |       |     |       |       |
| Pn_FE22    | : LFTAEQVIEIEBMMNSPDL  | -----EDDE        | TPTSIRLSMLS   | -----CEICTL       | LKRS-SMS-SVEE    | VRKRSVAFIND   | LEBEI       | SAI      | KE      | -YS    | : 231  |       |     |       |       |
| Nm_FE22    | : LFTAEQVIEIEBMMNSPDP  | -----EDDE        | TPTSIRLSMLS   | -----CEICTL       | LKRS-SMS-SVEE    | VRKRSVAFIND   | LEBEI       | SAI      | KE      | -YS    | : 235  |       |     |       |       |
| Md_FE22    | : LFTAEQVIEIEBMMNSPDP  | -----EDDE        | TPTSIRLSMLS   | -----CEICTL       | LKRS-SMS-SVEE    | VRKRSVAFIND   | LEBEI       | SAI      | KE      | -YS    | : 230  |       |     |       |       |
| Tg_FE22    | : LFTAEQVIEIEBMMNSPDP  | -----EDDE        | TPTSIRLSMLS   | -----CEICTL       | LKRS-STNN-SVEE   | VRKRSVAFIND   | LEBEI       | SAI      | KE      | -YS    | : 368  |       |     |       |       |
| Ec_FE22    | : LFTAEQVIEIEBMMNSPDP  | -----EDDE        | TPTSIRLSMLS   | -----CEICTL       | LKRS-STG-SVEE    | VRKRSVAFIND   | LEBEI       | SAI      | KE      | -YS    | : 242  |       |     |       |       |
| Tn_FE22    | : LFTAEQVIEIEBMMNSPDL  | -----EDDES       | SPSCLLSMLS    | -----CDHAL        | KRS-GSNS-SVED    | LRQLSVAFIND   | LEBEI       | SAI      | KE      | -YS    | : 250  |       |     |       |       |
| Dr_FE22    | : LFTAEQVIEIEBMMNSPDL  | -----EENEGSS     | FLLSMMS       | -----HDEHT        | LAHS-TSSS-SVEE   | LRGHCVSEITELL | LEBEI       | SAI      | KE      | -FS    | : 223  |       |     |       |       |
| Bf_FE22b   | : LFTAEQVIEIEBMMNSPDL  | -----EETP        | VSEISLSVLS    | -----CEML         | LRERSNTVT-SYD    | SKKPIPTQIN    | LEBEI       | SAI      | KE      | -YS    | : 248  |       |     |       |       |
| Bf_FE22a   | : LFTAEQVIEIEBMMNSPDL  | -----EETP        | VSEISLSVLS    | -----CEML         | LRERSNTVT-SYD    | SKKPIPTQIN    | LEBEI       | SAI      | KE      | -YS    | : 243  |       |     |       |       |
| Ci_FE21sim | : MCTADEVIEIEBMMNSPDL  | -----AVEDYE      | IQQTGILFDK    | SSLEDGEFQEP       | FPFASGLRPS       | IGSPSSQESDRAS | VKLTLTSEL   | INDADL   | DDQV    | KM     | -LS    | : 293 |     |       |       |
| Ca UNC76   | : PCATADQVIEIEBMMNSPDP | -----SMMD        | TRMESDMSYSS   | MRSFPFSSIQSS      | DDAIKLRSAQALVS   | -NPN          | QQLSYKTR    | LELCAEM  | QLDR    | YN     | : 267  |       |     |       |       |
| Em UNC76   | : PCATAEVIEIEBMMNSPDP  | -----SVMD        | TRMESDMSYSS   | MRSPLPN           | -GGYD            | MDIKLRQAVITS  | -NPN        | QQLSYKTR | LELCAEM | QLDR   | YN     | : 260 |     |       |       |
| Dp UNC76   | : IRKAVBEVIREIDDI      | MDAEAS           | -----PLD      | PPTCES            | -----EVE         | EKAREVLGAPL   | -YAEK       | QYLT     | TQIN    | LELYME | VLQ    | CE    | -LS | : 343 |       |
| Dd UNC76   | : IRKAVBEVIREIDDI      | MDAEAS           | -----PLD      | PPTCES            | -----EVE         | EKAREVLGAPL   | -VRR        | WFHPTG   | -----   | IEB    | AKL    | QEE   | CD  | : 347 |       |
| Ds UNC76   | : IRKAVBEVIREIDDI      | MDAEAS           | -----PLD      | PPTCDS            | -----EVE         | EKAREVLGAPL   | -YAEK       | QYLT     | TQIN    | LELYME | VLQ    | CE    | -LS | : 361 |       |
| Lm UNC76   | : IRKAVBEVIREIDDI      | MDAEAS           | -----PLD      | PPTCDS            | -----EVE         | EKAREVLGAPL   | -YAEK       | QYLT     | TQIN    | LELYME | VLQ    | CE    | -LS | : 370 |       |
| Dy UNC76   | : IRKAVBEVIREIDDI      | MDAEAS           | -----PLD      | PPTCDS            | -----EVE         | EKAREVLGAPL   | -YAEK       | QYLT     | TQIN    | LELYME | VLQ    | CE    | -LS | : 368 |       |
| Da UNC76   | : IRKAVBEVIREIDDI      | MDAEAS           | -----PLD      | PPTCDS            | -----EVE         | EKAREVLGAPL   | -YAEK       | QYLT     | TQIN    | LELYME | VLQ    | CE    | -LS | : 369 |       |
| Dw UNC76   | : IRKAVBEVIREIDDI      | MDAEAS           | -----PLD      | PPTCDS            | -----EVE         | EKAREVLGAPL   | -YAEK       | QYLT     | TQIN    | LELYME | VLQ    | CE    | -LS | : 361 |       |
| Dv UNC76   | : IRKAVBEVIREIDDI      | MDAEAS           | -----PLD      | PPTCDS            | -----EVE         | EKAREVLGAPL   | -YAEK       | QYLS     | STQIN   | LELYME | BMVLQ  | CE    | -LS | : 349 |       |
| Lmo UNC76  | : IRKAVBEVIREIDDI      | MDAEAS           | -----PLD      | PENCDS            | -----EVE         | EKAREVLGAPL   | -YAEK       | QYLS     | STQIN   | LELYME | BMVLQ  | CE    | -LS | : 359 |       |
| Dg UNC76   | : IRKAVBEVIREIDDI      | MDAEAS           | -----PLD      | PENCDS            | -----EVE         | EKAREVLGAPL   | -YAEK       | QYLS     | STQIN   | LELYME | BMVLQ  | CE    | -LS | : 355 |       |
| Tc UNC76   | : IRKAVBEVIREIDDI      | MDAEAS           | -----DGSP     | GRSDSILETN        | -----EVE         | EKAREVLGAPL   | -YAEK       | QYLS     | STQIN   | LELYME | BMVLQ  | CE    | -FS | : 293 |       |
| Ag UNC76   | : IRKAVBEVIREIDDI      | MDAEAS           | -----GS       | DGQLEN            | -----EVE         | EKAREVLGAPL   | -YAEK       | QYLS     | STQIN   | LELYME | BMVLQ  | CE    | -FS | : 317 |       |
| Nv UNC76   | : VRTADEVIREIDDI       | MDAEAS           | -----DVS      | MNSDS             | -IGAN            | -----EVE      | ERKREVLGAPL | -HEKN    | QYLS    | STQIN  | LELYME | BMVLQ | CE  | -LS   | : 271 |
| Am UNC76   | : IRKAVBEVIREIDDI      | MDAEAS           | -----ERSP     | SDGSLDSD          | -----EVE         | ERKREVLGAPL   | -HEKN       | QYLS     | STQIN   | LELYME | BMVLQ  | CE    | -LS | : 274 |       |
| Ph UNC76   | : VRTADEVIREIDDI       | MDAEAS           | -----DSE      | SPDC              | -----EVE         | ERKREVLGAPL   | -HEKN       | QYLS     | STQIN   | LELYME | BMVLQ  | CE    | -YS | : 305 |       |
| Ap UNC76   | : P-TRAEVIREIDDI       | MDAEAS           | -----NECTP    | -----DSE          | HPK              | -EVHS         | PL          | -LEEK    | NTN     | NVQIN  | LELYME | BMVLQ | CE  | -YS   | : 295 |

|            | * 540                           | * 560                           | * 580       | * 600 | * 620                              | *   |       |
|------------|---------------------------------|---------------------------------|-------------|-------|------------------------------------|-----|-------|
| Pt_FE21    | : EEIVQQLARRDELEFEKEVKNSFITVLI  | EVCNKCKQRELMKKRRR               | ---EKGLSLQS | ---   | SRIEKGNCMPLK                       | --- | : 314 |
| Hs_FE21    | : EEIVQQLARRDELEFEKEVKNSFITVLI  | EVCNKCKQRELMKKRRR               | ---EKGLSLQS | ---   | SRIEKGNCMPLKRRFSMEGINSILQSGIRQTFGS | --- | : 334 |
| Mf_FE21    | : EEIVQQLARRDELEFEKEVKNSFITVLI  | EVCNKCKQRELMKKRRR               | ---EKGLSLQS | ---   | SRIEKGNCMPLKRRFSMEGINSILQSGIRQTFGS | --- | : 334 |
| Nmt_FE21   | : EEIVQQLARRDELEFEKEVKNSFITVLI  | EVCNKCKQRELMKKRRR               | ---EKGLSLQS | ---   | SRIEKGNCMPLKRRFSMEGINSILQSGIRQTFGS | --- | : 334 |
| Bt_FE21    | : EEIVQQLARRDELEFEKEVKNSFITVLI  | EVCNKCKQRELMKKRRR               | ---EKGLSLQS | ---   | SRIEKGNCMPLKRRFSMEGINSILQSGIRQTFGS | --- | : 334 |
| Cf_FE21    | : EEIVQQLARRDELEFEKEVKNSFITVLI  | EVCNKCKQRELMKKRRR               | ---EKGLSLQS | ---   | SRIEKGNCMPLKRRFSMEGINSILQSGIRQTFGS | --- | : 334 |
| Rn_FE21    | : EEIVQQLARRDELEFEKEVKNSFITVLI  | EVCNKCKQRELMKKRRR               | ---EKGLSLQS | ---   | SRIEKGNCMPLKRRFSMEGINSILQSGIRQTFGS | --- | : 335 |
| Nm_FE21    | : EEIVQQLARRDELEFEKEVKNSFITVLI  | EVCNKCKQRELMKKRRR               | ---EKGLSLQS | ---   | SRIEKGNCMPLKRRFSMEGINSILQSGIRQTFGS | --- | : 334 |
| Md_FE21    | : EEIVQQLARRDELEFEKEVKNSFITVLI  | EVCNKCKQRELMKKRRR               | ---EKGLSLQS | ---   | SRIEKGNCMPLKRRFSMEGINSILQSGIRQTFGS | --- | : 334 |
| Xt_FE21    | : EEIVQQLARRDELEFEKEVKNSFITVLI  | EVCNKCKQRELMKKRRR               | ---EKGLSLQS | ---   | SRIEKGNCMPLKRRFSMEGINSILQSGIRQTFGS | --- | : 334 |
| Dt_FE21    | : EEIVQQLARRDELEFEKEVKNSFITVLI  | EVCNKCKQRELMKKRRR               | ---EKGLSLQS | ---   | SRIEKGNCMPLKRRFSMEGINSILQSGIRQTFGS | --- | : 334 |
| Ss_FE21    | : EEIVQQLARRDELEFEKEVKNSFITVLI  | EVCNKCKQRELMKKRRR               | ---EKGLSLQS | ---   | SRIEKGNCMPLKRRFSMEGINSILQSGIRQTFGS | --- | : 334 |
| Gg_FE21    | : EEIVQQLARRDELEFEKEVKNSFITVLI  | EVCNKCKQRELMKKRRR               | ---EKGLSLQS | ---   | SRIEKGNCMPLKRRFSMEGINSILQSGIRQTFGS | --- | : 334 |
| Xt_FE22    | : EEIVQQLARRDELEFEKEVKNSFITVLI  | EVCNKCKQRELMKKRRR               | ---EKGLSLQS | ---   | SRIEKGNCMPLKRRFSMEGINSILQSGIRQTFGS | --- | : 335 |
| Xl_FE22    | : EEIVQQLARRDELEFEKEVKNSFITVLI  | EVCNKCKQRELMKKRRR               | ---EKGLSLQS | ---   | SRIEKGNCMPLKRRFSMEGINSILQSGIRQTFGS | --- | : 336 |
| Cf_FE22    | : EEIVQQLARRDELEFEKEVKNSFITVLI  | EVCNKCKQRELMKKRRR               | ---EKGLSLQS | ---   | SRIEKGNCMPLKRRFSMEGINSILQSGIRQTFGS | --- | : 336 |
| Bt_FE22    | : EEIVQQLARRDELEFEKEVKNSFITVLI  | EVCNKCKQRELMKKRRR               | ---EKGLSLQS | ---   | SRIEKGNCMPLKRRFSMEGINSILQSGIRQTFGS | --- | : 336 |
| Hs_FE22    | : EEIVQQLARRDELEFEKEVKNSFITVLI  | EVCNKCKQRELMKKRRR               | ---EKGLSLQS | ---   | SRIEKGNCMPLKRRFSMEGINSILQSGIRQTFGS | --- | : 336 |
| Pt_FE22    | : EEIVQQLARRDELEFEKEVKNSFITVLI  | EVCNKCKQRELMKKRRR               | ---EKGLSLQS | ---   | SRIEKGNCMPLKRRFSMEGINSILQSGIRQTFGS | --- | : 336 |
| Rn_FE22    | : EEIVQQLARRDELEFEKEVKNSFITVLI  | EVCNKCKQRELMKKRRR               | ---EKGLSLQS | ---   | SRIEKGNCMPLKRRFSMEGINSILQSGIRQTFGS | --- | : 336 |
| Nm_FE22    | : EEIVQQLARRDELEFEKEVKNSFITVLI  | EVCNKCKQRELMKKRRR               | ---EKGLSLQS | ---   | SRIEKGNCMPLKRRFSMEGINSILQSGIRQTFGS | --- | : 336 |
| Md_FE22    | : EEIVQQLARRDELEFEKEVKNSFITVLI  | EVCNKCKQRELMKKRRR               | ---EKGLSLQS | ---   | SRIEKGNCMPLKRRFSMEGINSILQSGIRQTFGS | --- | : 336 |
| Tg_FE22    | : EEIVQQLARRDELEFEKEVKNSFITVLI  | EVCNKCKQRELMKKRRR               | ---EKGLSLQS | ---   | SRIEKGNCMPLKRRFSMEGINSILQSGIRQTFGS | --- | : 336 |
| Ec_FE22    | : EEIVQQLARRDELEFEKEVKNSFITVLI  | EVCNKCKQRELMKKRRR               | ---EKGLSLQS | ---   | SRIEKGNCMPLKRRFSMEGINSILQSGIRQTFGS | --- | : 336 |
| Tn_FE22    | : EEIVQQLARRDELEFEKEVKNSFITVLI  | EVCNKCKQRELMKKRRR               | ---EKGLSLQS | ---   | SRIEKGNCMPLKRRFSMEGINSILQSGIRQTFGS | --- | : 336 |
| Dt_FE22    | : EEIVQQLARRDELEFEKEVKNSFITVLI  | EVCNKCKQRELMKKRRR               | ---EKGLSLQS | ---   | SRIEKGNCMPLKRRFSMEGINSILQSGIRQTFGS | --- | : 336 |
| Bf_FE22b   | : EEIVQQLARRDELEFEKEVKNSFITVLI  | EVCNKCKQRELMKKRRR               | ---EKGLSLQS | ---   | SRIEKGNCMPLKRRFSMEGINSILQSGIRQTFGS | --- | : 336 |
| Bf_FE22a   | : EEIVQQLARRDELEFEKEVKNSFITVLI  | EVCNKCKQRELMKKRRR               | ---EKGLSLQS | ---   | SRIEKGNCMPLKRRFSMEGINSILQSGIRQTFGS | --- | : 336 |
| Ci_FE21sim | : ADLLHGLGRDEIYIEYEVKNCFISRVLE  | VCYKQGEFFKVAAPPKFKG             | ---         | ---   | RLRKSATTDVSAG                      | --- | : 356 |
| Ca_UNC76   | : ESIWDELARRDEIYIEYEMKNSFISLLI  | ATCNRRRYVANDKRRVVGKASDASQ       | ---         | ---   | ---                                | --- | : 320 |
| Hm_UNC76   | : DSIVDELARRDEIYIEYEMKNTFISLLI  | SCNRRRHFHTNEKRRKLPKTDPSQ        | ---         | ---   | ---                                | --- | : 312 |
| Dps_UNC76  | : ETLINSLARRDEIYIEYKELKNSFISLLI | AVCNRRQYHVEKRRGKRFQGP           | ---         | ---   | ---                                | --- | : 393 |
| Dd_UNC76   | : GSIARLSSNMGATLSVRRGNEVTHIRI   | CNNGDFDL                        | ---         | ---   | YGGK                               | --- | : 391 |
| Ds_UNC76   | : ETLINSLARRDEIYIEYKELKNSFISLLI | AVCNRRQYHVEKRRGKRFQGP           | ---         | ---   | ---                                | --- | : 411 |
| Lm_UNC76   | : ETLINSLARRDEIYIEYKELKNSFISLLI | AVCNRRQYHVEKRRGKRFQGP           | ---         | ---   | ---                                | --- | : 420 |
| Dy_UNC76   | : ETLINSLARRDEIYIEYKELKNSFISLLI | AVCNRRQYHVEKRRGKRFQGP           | ---         | ---   | ---                                | --- | : 418 |
| Da_UNC76   | : ETLINSLARRDEIYIEYKELKNSFISLLI | AVCNRRQYHVEKRRGKRFQGP           | ---         | ---   | ---                                | --- | : 419 |
| Dw_UNC76   | : ETLINSLARRDEIYIEYKELKNSFISLLI | AVCNRRQYHVEKRRGKRFQGP           | ---         | ---   | ---                                | --- | : 411 |
| Dv_UNC76   | : ETLINSLARRDEIYIEYKELKNSFISLLI | AVCNRRQYHVEKRRGKRFQGP           | ---         | ---   | ---                                | --- | : 399 |
| Lmo_UNC76  | : ETLINSLARRDEIYIEYKELKNSFISLLI | AVCNRRQYHVEKRRGKRFQGP           | ---         | ---   | ---                                | --- | : 409 |
| Dg_UNC76   | : ETLINSLARRDEIYIEYKELKNSFISLLI | AVCNRRQYHVEKRRGKRFQGP           | ---         | ---   | ---                                | --- | : 405 |
| Tc_UNC76   | : ETLINSLARRDEIYIEYKELKNTFISLLI | AVCNRRQYHVEKRRGKRSLNKSTPSGL     | ---         | ---   | ---                                | --- | : 348 |
| Ag_UNC76   | : ETLINSLARRDEIYIEYKELKNTFISLLI | AVCNRRQYHVEKRRGKRSAGGRGSAGM     | ---         | ---   | ---                                | --- | : 371 |
| Nv_UNC76   | : ETLINSLARRDEIYIEYKELKNTFISLLI | AVCNRRQYHVEKRRGKRSNQLNGTSPLLQRR | ---         | ---   | ---                                | --- | : 328 |
| Am_UNC76   | : ETLINSLARRDEIYIEYKELKNTFISLLI | AVCNRRQYHVEKRRGKRSNQLNGTSPLLQRR | ---         | ---   | ---                                | --- | : 331 |
| Ph_UNC76   | : ETLINSLARRDEIYIEYKELKNTFISLLI | AVCNRRQYHVEKRRGKRSNQLNGTSPLLQRR | ---         | ---   | ---                                | --- | : 361 |
| Ap_UNC76   | : ETLINSLARRDEIYIEYKELKNTFISLLI | AVCNRRQYHVEKRRGKRSNQLNGTSPLLQRR | ---         | ---   | ---                                | --- | : 351 |

```

640          *          660          *          700          *          720          *
Pt_FE21 : ----VINTVIPYEKKASPEVSVDLQMLN-----IFAMKEDNEKVPITLLTDYILR-VLCPT : 366
Hs_FE21 : SGTDKQINIVIPYEKKASPEVSVDLQMLN-----IFAMKEDNEKVPITLLTDYILR-VLCPT : 392
Mf_FE21 : SGSDKQINIVIPYEKKASPEVSVDLQMLN-----IFAMKEDNEKVPITLLTDYILR-VLCPT : 392
Nmt_FE21 : SGSDKQINIVIPYEKKASPEVSVDLQMLN-----IFAMKEDNEKVPITLLTDYILR-VLCPT : 392
Bt_FE21 : SGSDKQINIVIPYEKKASPEVSVDLQMLN-----IFAMKEDNEKVPITLLTDYILR-VLCPT : 392
Cf_FE21 : SGTDKQINIVIPYEKKALPEVSVDLQMLN-----IFAMKEDNEKVPITLLTDYILR-VLCPT : 392
Rn_FE21 : SGADRCINIVIPYEKKSSPEVSVDLQMLN-----IFAMKEDNEKVPITLLTDYILR-VLCPT : 393
Nm_FE21 : SGADRCINIVIPYEKKSSPEVSVDLQMLN-----IFAMKEDNEKVPITLLTDYILR-VLCPT : 392
Md_FE21 : SGTDKQINIVIPYEKKASPEVSVDLQMLN-----IFAMKEDNEKVPITLLTDYILR-VLCPT : 392
Xt_FE21 : SGNDKQINIVIPYEKRGTPPEVSVDLQMLN-----IYAMKEDSEKVPITLLTDYILR-VLCPT : 392
Dr_FE21 : SGTEKQINIVIPYEKRGTPPEVSDDLQMLR-----IYAMKEDSEKVPITLLTDYILR-VLCPT : 394
Ss_FE21 : TGTDRQINIVIPYEKKATPEVTDLQMLN-----IYAMKEDSEKVPITLLTDYILR-VLCPT : 419
Gg_FE21 : ----VINTVIPYEKKGSPPEVSVDLQMLN-----IFAMKEDNEKVPITLLTDYILR-VLCPT : 366
Xt_FE22 : ----VLTVIPYEKNGPPEVSVDLQILR-----IIRAMIDSDKVPISLLTDYILR-VLCPT : 381
X1_FE22 : ----VLTVIPYEKNGPPEVSVDLQILR-----IIRAMIDSDKVPISLLTDYILR-VLCPT : 354
Cf_FE22 : ----VLTVIPYEKNGPPEVSVDLQILR-----IIRAMKEDSEKVPISLLTDYILR-VLCPT : 349
Bt_FE22 : SGGEKQINIVIPYEKNGPPEVSVDLQILR-----IIRAMKEDSEKVPISLLTDYILR-VLCPT : 376
Hs_FE22 : ----VLTVIPYEKNGPPEVSVDLQILR-----IIRAMKEDSEKVPISLLTDYILR-VLCPT : 353
Pt_FE22 : ----VLTVIPYEKNGPPEVSVDLQILRKRRLLVNPIPLFLSPLFGNFKSGKQLS-----IIRAMKEDSEKVPISLLTDYILR-VLCPT : 383
Rn_FE22 : ----VLTVIPYEKNGPPEVSVDLQILR-----IIRAMKEDSEKVPISLLTDYILR-VLCPT : 348
Nm_FE22 : ----VLTVIPYEKNGPPEVSVDLQILR-----IIRAMKEDSEKVPISLLTDYILR-VLCPT : 352
Md_FE22 : ----VLTVIPYEKNGPPEVSVDLQILR-----IIRAMKEDSDKVPISLLTDYILR-VLCPT : 347
Tg_FE22 : SSGEKQINIVIPYEKNGPPEVSVDLQILR-----IIRAMKEDSEKVPISLLTDYILR-VLCPT : 512
Ec_FE22 : SGAEKQINIVIPYEKNGPPEVSVDLQILR-----IIRAMKEDSEKVPISLLTDYILRGLKQAPNCPAPHVRAAGSSL-----400
Tn_FE22 : TGGDKQINIVIPYEKKAGTPEVSVDLQILR-----IIRAMIDSEKVPISLLTDYILR-GKPAATFF-----401
Dr_FE22 : ----VLTVIPYMDRSSGSEVSDDLQILR-----IIRAMKEDSDTVEALLTDYILR-VLCPT : 339
Bf_FE22b : ----FLYVIPYEKNSPMTASDLQILR-----IIVAMSESDKVPISLLTDYILRGLQGLDSETPFNWIKHIKLVASHII : 379
Bf_FE22a : ----FLYVIPYEKNSPMTASDLQILR-----IIVAMSESDKVPISLLTDYILR-----350
Ci_FE21sim : ----RNLRSVIECS-SGPTETLNLQAMIK-----IIRAMIDSDSEVPISLLTDYILR-VLCFAPNGSRTLKL-----417
Ca_UNC76 : ----LPCMLTATIPYND-HQHIDNASRSLR-----IIRAHIDNTVPTLLTDYIILT-HVCKNISC-----378
Em_UNC76 : ----LPCMLTATIPYDESLYVDNNTMLALIK-----IIRAHIDSDPAVPSMLTDYIILT-VLCPSASSSVITDLAA-----378
Dps_UNC76 : ----PRMLTIVIPMHLENGTENNLSLOVILR-----IIRAHIDSDPTVEALLTDYILR-VLCPT : 447
Dp_UNC76 : ----FATIPPELVQNYMENGELKEKNGAIEL-----KQPLCAEPTTER-----431
Ds_UNC76 : ----PRMLTIVIPMHLENGTENNLSLOVILR-----IIRAHIDSDPTVEALLTDYILR-VLCPT : 465
Lm_UNC76 : ----PRMLTIVIPMHLENGTENNLSLOVILR-----IIRAHIDSDPTVEALLTDYILR-VLCPT : 474
Dy_UNC76 : ----PRMLTIVIPMHLENGTENNLSLOVILR-----IIRAHIDSDPTVEALLTDYILR-VLCPT : 472
Da_UNC76 : ----PRMLTIVIPMHLENGTENNLSLOVILR-----IIRAHIDSDPTVEALLTDYILR-VLCPT : 473
Dw_UNC76 : ----PRMLTIVIPMHLENGTENNLSLOVILR-----IIRAHIDSDPTVEALLTDYILR-VLCPT : 465
Dv_UNC76 : ----PRMLTIVIPMHLENGTENNLSLOVILR-----IIRAHIDSDPTVPTLLTDYILR-VLCPT : 453
Lmo_UNC76 : ----PRMLTIVIPMHLENGTENNLSLOVILR-----IIRAHIDSDPTVPTLLTDYILR-VLCPT : 463
Dg_UNC76 : ----PRMLTIVIPMHLENGTENNLSLOVILR-----IIRAHIDSDPTVPTLLTDYILR-VLCPT : 459
Tc_UNC76 : ----DPRMLTIVIPMHLDSPEDNATLOVILR-----IIRAHIDSDPTVPTLLTDYILR-VLCPT : 403
Ag_UNC76 : ----DPRMLTIVIPMGLNS-TEDNATLOVILR-----IIRAHIDSDPTVEALLTDYILR-VLCPT : 425
Nv_UNC76 : SIQESRMLTIVIPYHTDNGLLDTCALQVILR-----IIRAHIDSDPAVEALLTDYILR-VLCPT : 386
Am_UNC76 : SLQESRMLTIVIPYHTDNGEDDTCALQVILR-----IIRAHIDSDPTVPTLLTDYILR-VLCPT : 389
Ph_UNC76 : ----ESKMLTIVIPYHDSGPENNALQVILR-----IIRAHIDSNPMVPTLLTDYILR-VLCPT : 416
Ap_UNC76 : ----EPRMLTIVIPMHLDSEGLSNALQVILR-----IIRAHIDSDPTVPTLLTDYILR-EINIMFLYSLLIL-----415

```
